# Supplementary material for: Machine learning-informed and synthetic biology-enabled semi-continuous algal cultivation to unleash renewable fuel productivity
Source: PubMed Central journal article supplement (PMC8795378; doi:10.1038/s41467-021-27665-y), 2022-01-27
Supplement: 41467_2021_27665_MOESM1_ESM.pdf [file 41467_2021_27665_MOESM1_ESM.pdf]

1 **Machine learning-informed and synthetic biology-enabled semi-continuous algal**  
2 **cultivation to unleash renewable fuel productivity**

3 Long *et al.*

## 4 **Supplementary Method 1. Training data collection and processing for light pattern**

### 5 **prediction**

6 In order to access real-time light availability inside algal culture, we first developed a light  
7 distribution pattern prediction model (LDPM) to predict light distribution patterns (LDPs) in a  
8 cuboid photobioreactor (PBR). We collected 138 LDPs in the PBR (19.6 cm in length  $\times$  9.6 cm  
9 in width  $\times$  20 cm in height) with 23 different cell concentrations and 6 different light intensities  
10 as training samples for the machine-learning model. The LDPs were captured by a camera fixed  
11 on top of a PBR containing different cell concentrations and illuminated with different light  
12 intensities. A LED light bar (4000K, CRI =80) placed on one side of the photobioreactor was  
13 used as a light source (Figure 1A). The illuminance was monitored by a sensor on the surface  
14 of the photobioreactor and converted to photosynthetic photon flux density (PPFD) with a  
15 coefficient of 56. The twenty-three cell concentration gradients were set to 0.11973, 0.21294,  
16 0.40872, 0.45162, 0.54405, 0.62712, 0.74256, 0.82056, 0.90948, 0.96915, 1.10604, 1.2246,  
17 1.3026, 1.3923, 1.443, 1.5444, 1.7901, 1.9188, 2.0241, 2.3556, 2.535, 2.9601, 3.6777 g/L,  
18 while the six light intensity gradients were set to 107, 178, 267, 357, 570, 714  $\mu\text{mol m}^{-2} \text{s}^{-1}$ .  
19 The camera was set to manual mode and all parameters were locked throughout the  
20 photographing process to ensure consistency. After acquiring all LDPs, raw pictures were  
21 cropped, converted to grayscale, and compressed to  $40 \times 18$  pixels in Photoshop 2020 (Figure  
22 1A). The compressed images were used to represent the light distribution pattern inside the  
23 photobioreactor with grayscale values (GSVs) representing light intensities. The GSVs were  
24 extracted from the grayscale images with the CV2 module in Python. To evaluate the accuracy  
25 of GSVs representing light intensities, we extracted GSVs at (0, 20) (row 0, column 20) from

26 LDPs over a wide range of cell concentrations and assessed the linearity between GSV and light  
27 intensity.

28 The training sample collection for pond LDPM is shown in Figure S10A. LDP images were  
29 captured from a simplified pond setup (Figure S10A) and the collected LDP images were  
30 converted to  $208 \times 10$ -pixel grayscale images as mentioned above. The light intensities for the  
31 pond LDP training samples were set to 196, 268, 357, 446, 536, 625, 714, 804, 964, 1071, 1161,  
32 1250, 1339, 1429, 1518, 1607, 1696, 1786, 1875  $\mu\text{mol m}^{-2} \text{s}^{-1}$ , and cell concentrations were set  
33 to 0.062, 0.140, 0.228, 0.337, 0.466, 0.620, 0.871, 0.999, 1.177, 1.254, 1.396, 1.482, 1.553,  
34 2.007, 2.320, 2.814, 3.199, 3.694, 4.577, 5.519 g/L. The LDP for the pond system was set to be  
35 one-dimensional and represented with the 208 pixels in the middle column (column 5) of the  
36 LDP image.

## 37 **Supplementary Method 2. LDPM training and evaluation**

38 Due to the high complexity of the LDP inside algal culture and limited training samples, we  
39 believe that predicting LDPs pixel by pixel is the best method for accurate prediction. Pixel-by-  
40 pixel prediction means that individual pixels in LDP images are treated as individual models and  
41 then combined, rather than treating the whole image as one model. Thus, we trained 720 models  
42 for a  $40 \times 18$ -pixel LDP prediction. Cell concentrations and light intensities, two major factors  
43 shaping LDP, were set as features in training with the corresponding GSVs at each pixel as labels.  
44 Both features and labels were normalized by subtracting their average and dividing by their  
45 standard deviation. Around 10% of the training samples were randomly selected as testing samples.  
46 We chose Support Vector Regression with a Radial Basis Function kernel (SVR-RBF) as the  
47 algorithm and kernel for the prediction in this study. SVR-RBF from an open-source machine  
48 learning library, scikit-learn<sup>1</sup>, was used for training and prediction. We selected the best models at  
49 each pixel by selecting the combinations of parameters (C:1, 10, 100, 1000, 3000; gamma: 0.003,  
50 0.01, 0.03, 0.1, 0.3,1.) returning the highest  $R^2$  score. Prediction accuracy was determined by  
51 overall evaluation and by pixel-by-pixel evaluation. The overall evaluation calculated an  $R^2$  value  
52 by comparing all predicted GSVs with measured GSVs in the testing data set to assess the overall  
53 prediction accuracy of the model. Pixel-by-pixel evaluation calculated the  $R^2$  value at each pixel  
54 to assess the prediction accuracy at different positions on LDPs. Accuracy percentages were  
55 calculated by counting pixels with an  $R^2$  score larger than 0.90 (or between 0.79 and 0.85), and  
56 dividing by 720. The  $R^2$  evaluation was performed with the metrics module on scikit-learn. The  
57 matplotlib module in Python was used for visualization of evaluation results and predicted images<sup>2</sup>.

### 58 **Supplementary Method 3. Dark area calculation**

59 In the machine-learning training process, we collected LDPs from a larger cuboid  
60 photobioreactor (19.6 cm in length  $\times$  9.6 cm in width  $\times$  20 cm in height) in order to get more  
61 information from a single image. However, the photobioreactor used for cultivation was a  
62 smaller photobioreactor 10 cm long and 5 cm wide. To adapt the pre-trained models to the  
63 smaller photobioreactor, we selected the 10 left-most columns (column 0-9) and 10 right-most  
64 columns (column 30-39) in the 9 rows (row 0-8) closest to the light source in the LDP of the  
65 larger photobioreactor to represent the LDP of the smaller photobioreactor. Thus, LDPs in small  
66 photobioreactors were represented by images with 180 (20  $\times$  9) pixels. For dark area calculation,  
67 grayscale values less than 25.5 (1/10 of the maximum grayscale value) were counted (n) and  
68 normalized as percentages of LDP pixels (n/180 $\times$ 100%). The dark area with double light sources  
69 was estimated with the following equation (1), assuming no interference between light from  
70 two sources:

$$71 \quad A_2 = \begin{cases} (1 - (1 - A_1) \times 2) \times 100\% & \text{if } A_1 > 50\%; \\ 0 & \text{if } A_1 < 50\%; \end{cases} \quad (1)$$

72 Where  $A_1$  and  $A_2$  refer to dark areas with one and two light sources at given light intensities,  
73 respectively.

74 **Supplementary Method 4. Growth curve fitting, growth rate calculation, and biomass**  
75 **productivity prediction**

76 To generate a growth curve, we collected cell concentration under given light intensities at  
77 different time points by measuring OD<sub>730</sub>. Variables were normalized by subtracting their  
78 average and dividing by their standard deviation. The logistic curve was defined as the equation  
79 (2):

80 
$$f(x) = \frac{a}{(1 + e^{-c(x-d)})} + b \quad (2)$$

81 Where  $x$  represents the variable here, representing time and  $a$ ,  $b$ ,  $c$ ,  $d$  are parameters that  
82 determine the shape of the growth curve. The fitting and prediction were processed by the  
83 Optimize module in the SciPy library in Python<sup>3</sup>. Growth rates at specific time points were  
84 estimated by the slope of the corresponding curve at that point.

## 85 **Supplementary Method 5. Growth Rate Prediction Model (GRM) training and evaluation**

86 The GRM was trained to predict cyanobacterial growth rates based on the LDPs (Figure  
87 2B). In order to collect training data, we cultivated cyanobacteria under different light  
88 intensities (107, 178, 267, 357, 570, 714  $\mu\text{mol m}^{-2} \text{s}^{-1}$ ) in the smaller PBR. The concentration  
89 of the cyanobacteria was monitored and fitted with sigmoid curves for growth rate calculations  
90 mentioned above. Vectors extracted from the first 9 rows in the middle column of the LDP were  
91 used as features, and the corresponding (at the same time points) calculated growth rates were  
92 set as labels in the training. The features were normalized by subtracting their averages and  
93 dividing by their standard deviations. The random forest algorithm was used for the GRM model  
94 and the performance of the model was evaluated by calculating an  $R^2$  value between the  
95 predicted and measured growth rates in the reserved testing set (20% of the training samples).  
96 The GRM was adapted to predict growth rates under a double-light condition based on the  
97 assumption that there are no interferences between light from two sources. In this way, vectors  
98 extracted from the first 5 rows of the middle columns of LDPs were used as features for the  
99 GRM training.

100 Similar to the GRM for PBR, we grew several batches of cyanobacteria in a pond system to  
101 acquire the growth data for pond GRM training. The growth data were then fitted with sigmoid  
102 curves for growth rate calculation. The normalized 208-length vectors predicted from the pond  
103 LDPM and the calculated growth rates were set as features and labels, respectively, for the pond  
104 GRM training. The training and evaluation of the pond GRM were the same as the PBR GRM  
105 described above.

## 106 **Supplementary Method 6. Growth simulation**

107 Cyanobacterial growth simulation was performed as shown in Figure 2A. An initial cell  
108 concentration and light program are required inputs and the simulation process contains a loop  
109 with four steps: 1) predict the LDP based on the initial cell concentration and initial light  
110 intensity with the LDPM; 2) predict the growth rate based on the LDP from step 1 with the  
111 GRM; 3) calculate the new cell concentration from the initial cell concentration and the  
112 predicted growth rate; 4) update the newly calculated cell concentration and current light  
113 intensity as inputs for the next round of LDP prediction. The light programs were specified in  
114 the main text. The initial cell concentration used for PBR growth simulation ranged from 0.2 to  
115 4.8, with a 0.2 increment. The initial concentration used for pond growth simulation was set to  
116 0.1, 0.4, 0.6, and 0.8. To ensure accurate growth simulation, the bubbling rate, temperature,  
117 surface area, and light conditions were tightly controlled in a way that no severe sedimentation  
118 happens during cultivation in PBRs, while these conditions were controlled to achieve  
119 sedimentation in collection vessel.



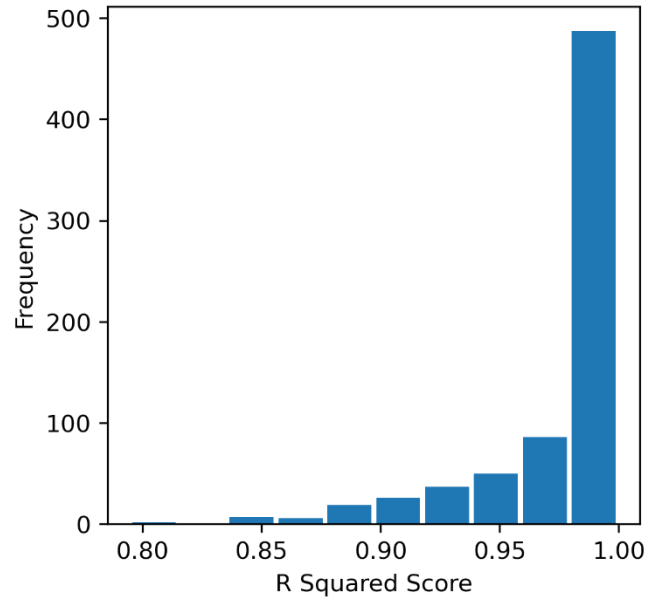

120

121 **Supplementary Figure 1. Pixel-by-pixel evaluation of LDPM prediction over testing**

122 **samples.** 94.4% of pixels achieved  $R^2$  values higher than 0.90, and only 0.8% of pixels had  $R^2$

123 values in the range of 0.79 to 0.85.

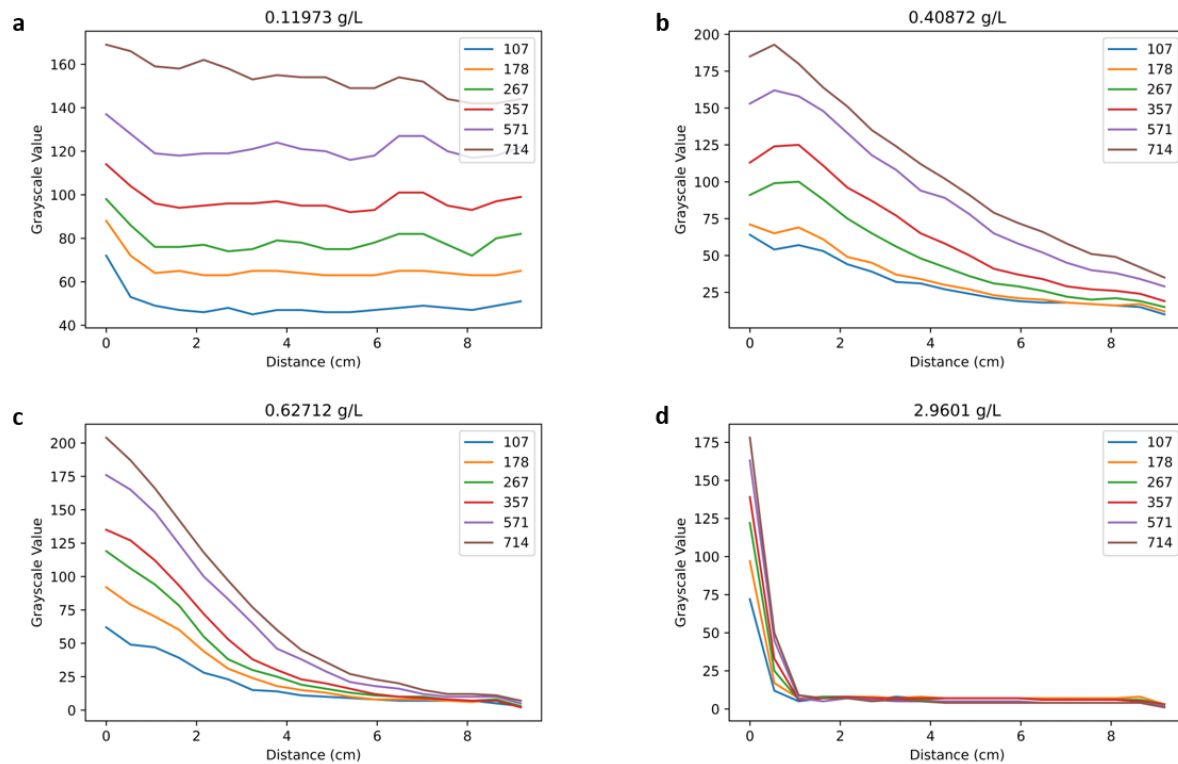

124

125 **Supplementary Figure 2. Light intensity (represented by GSV) changes over the length of**  
 126 **the light path.** GSVs in the middle column (column 20, row 1 - 18) of LDPs were extracted to  
 127 represent light intensities over light paths and plotted against distances from light sources (a-d).  
 128 Different colors in the figures represent different intensities of light sources (107, 178, 267, 357,  
 129 570, 714  $\mu\text{mol m}^{-2} \text{s}^{-1}$ ). Light intensity decreased only slightly over the path when cell  
 130 concentration was low (a). But significant decreases were observed when cell concentration  
 131 increased (b, c), and light intensity dropped sharply (GSV below 20 within 1 cm) when cell  
 132 concentration reached 2.9601 g/L (d). The results suggest intensified mutual shading at higher cell  
 133 concentration. Source data are provided as a Source Data file.

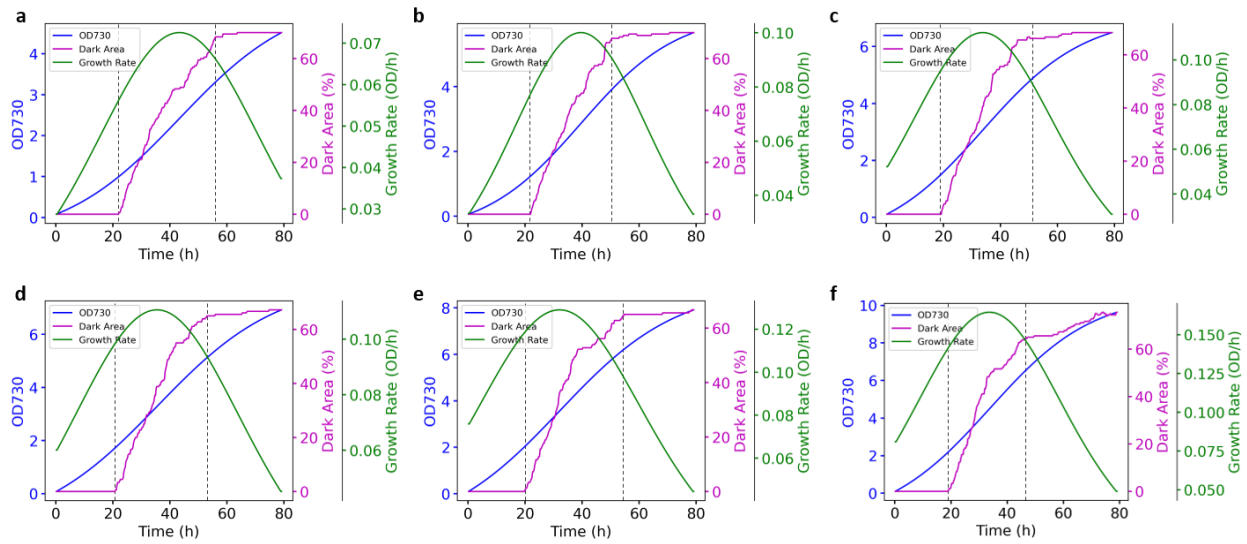

134

135 **Supplementary Figure 3. Relationship between cell concentration (OD<sub>730</sub>), dark area derived**

136 **from LDP, and growth rate.** Growth curves (blue) were generated by fitting cell concentration

137 (OD<sub>730</sub> and time) collected from cultivations under light intensities at 107 (a), 178 (b), 267 (c), 357

138 (d), 570 (e), 714 (f) μmol m<sup>-2</sup> s<sup>-1</sup>. Slopes of growth curves were calculated to represent growth

139 rates at these light intensities (green, a-f). LDPs over the growth at given light conditions were

140 predicted by LDPM and dark areas were defined as LDP pixels with GSVs less than 25.5 (magenta,

141 a-f). Growth rates peaked at 36.8 ± 4.7 hours and dark areas reached 43.1 ± 4.9% regardless of

142 light intensity (green, magenta, a-f). Overall, dark areas experienced three stages: zeros stage (left

143 of the first dashed line), increasing stage (in between the first and second dashed lines), and plateau

144 stage (right of the second dashed line) (magenta, a-f). The increasing stage (between dashed lines)

145 overlapped significantly with the fastest growth period of cyanobacteria (green, magenta, a-f).

146 Source data are provided as a Source Data file.

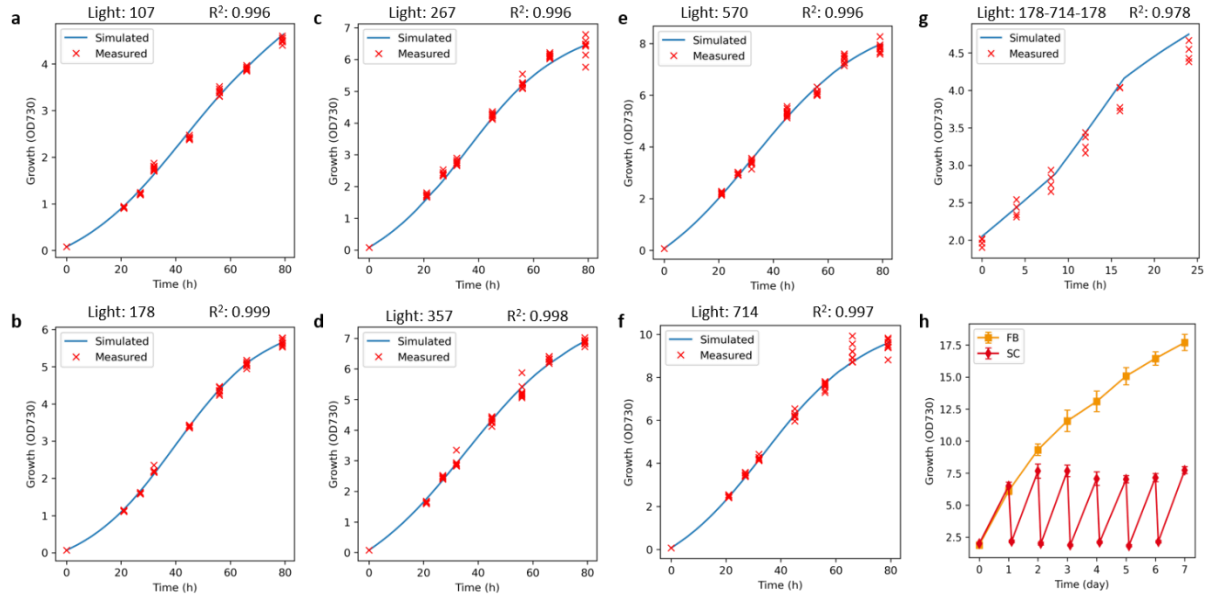

147

148 **Supplementary Figure 4. Validation of growth simulation by machine-learning models under**  
 149 **different growth conditions and comparison between semi-continuous algal cultivation (SAC)**  
 150 **and fed-batch.** The growth simulation achieved  $R^2$  scores of 0.996 (a), 0.999 (b), 0.996 (c), 0.998  
 151 (d), 0.996 (e), 0.997 (f), and 0.978 (g) under light intensities of 107, 178, 267, 357, 570, 714, and  
 152 178-714-178  $\mu\text{mol m}^{-2} \text{s}^{-1}$ , indicating high prediction accuracy. (h) Growth comparison of UTEX  
 153 2973 with SAC and fed-batch cultivation Data are presented as mean values  $\pm$  standard deviations  
 154 ( $n = 3$  independent samples). Source data are provided as a Source Data file.

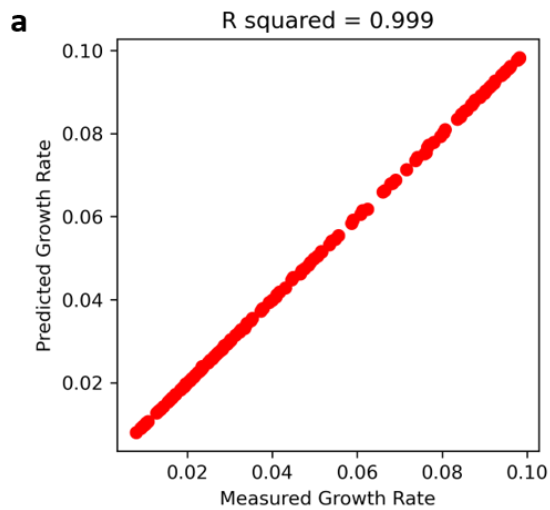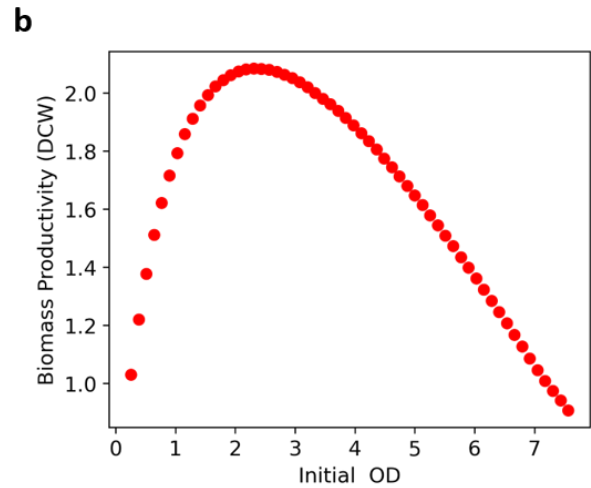

155

156 **Supplementary Figure 5. GRM adapted for growth rate prediction with double light sources.**

157 a, validation of the growth rate prediction by the GRM adapted for double light. b, Growth

158 simulation suggests setting initial OD<sub>730</sub> at 2.3 delivers highest biomass productivity. Source data

159 are provided as a Source Data file.

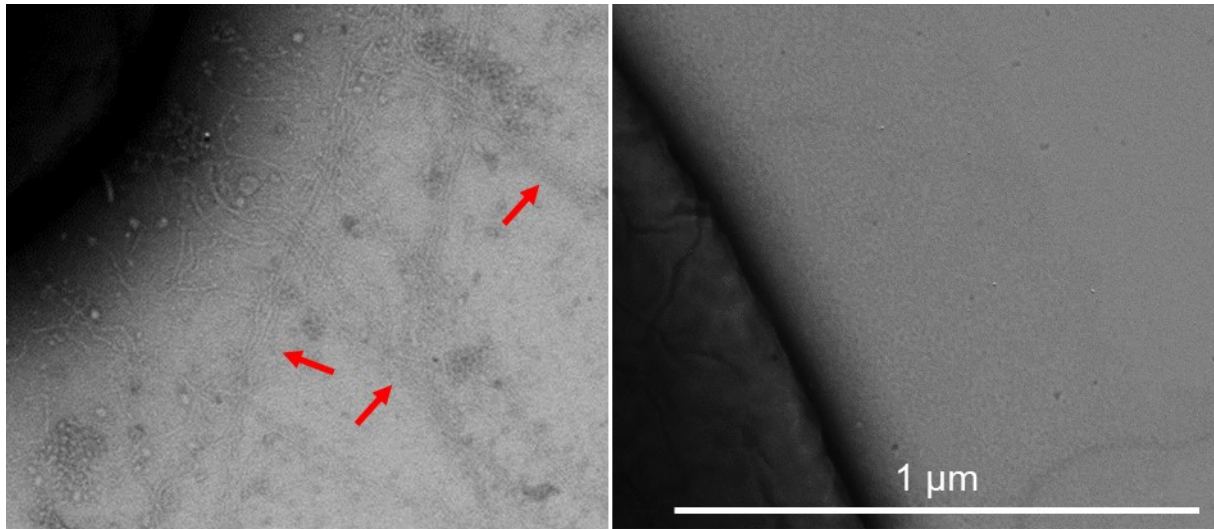

PCC 7942

UTEX 2973

160

161 **Supplementary Figure 6. Transmission electron microscopy reveals cell surface differences**  
162 **between *Synechococcus elongatus* PCC 7942 and UTEX 2973.** UTEX 2973 showed relatively  
163 smooth cell surface compared to PCC 7942, where lots of pili formed. Similar results were found  
164 in two independent observations. Original images are provided as a Source Data File.

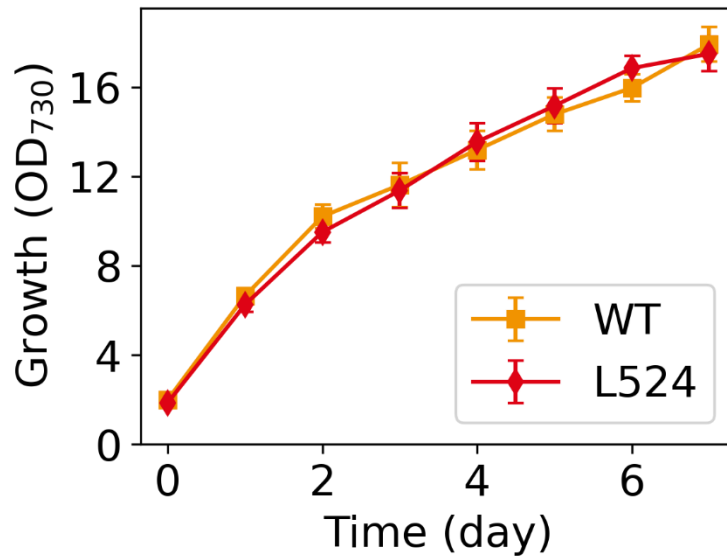

165

166 **Supplementary Figure 7. Comparison of growth between UTEX 2973 WT and L524.** No

167 significant growth differences were found between WT and L524 in the given growth conditions.

168 Data are presented as mean values +/- standard deviations (n = 3 independent samples). Source

169 data are provided as a Source Data file.

170

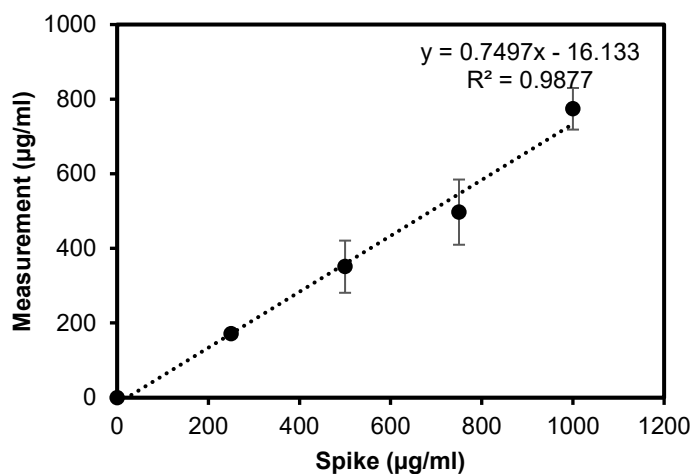

171

172 **Supplementary Figure 8. Standard curve used to normalize limonene productivity with**  
173 **recovery rate.** Limonene concentrations of 250, 500, 750, 1000 µg/mL were used to spike the  
174 UTEX 2973 wildtype cells. Limonene was collected and measure as described in the Methods of  
175 the main text. Data are presented as mean values +/- standard deviations (n = 3 independent  
176 samples). Source data are provided as a Source Data file.



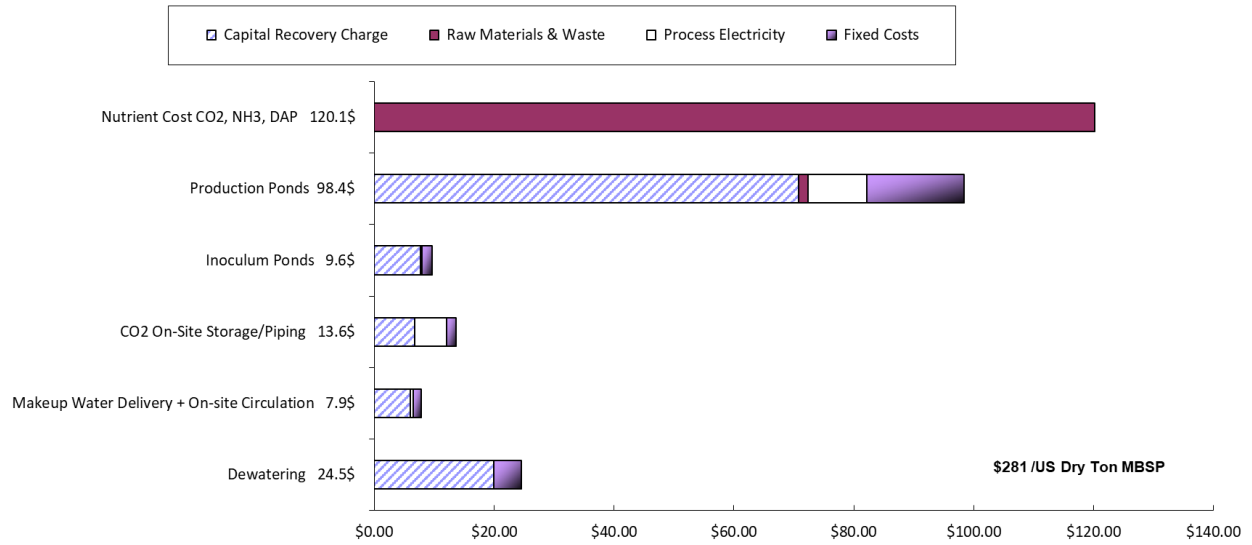

177

178 **Supplementary Figure 9. Techno-economic analysis of the pond SAC platform.** The NREL

179 algae farm model projects a MBSP of approximately \$281 per ton based on the outdoor trial yield.

180 Cost breakdown suggests the dewatering process accounts for \$24.50 per ton.

181

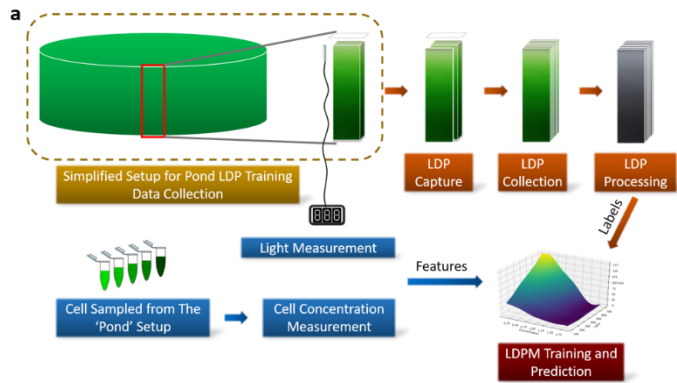

182

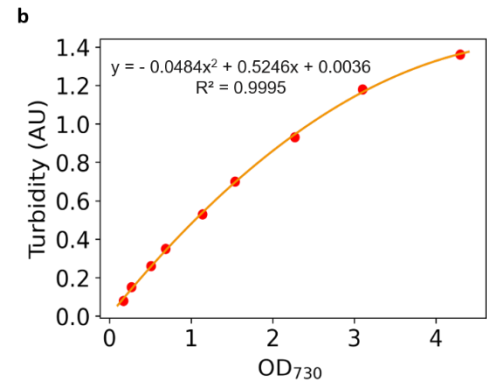

183 **Supplementary Figure 10. LDP prediction for open pond system and conversion between**  
184 **turbidity and OD<sub>730</sub>.** The process of adapting LDPM for pond system prediction (a) and the  
185 calibration curve for OD-turbidity (Attenuation Unit, AU) conversion (b). Source data are  
186 provided as a Source Data file.

187 **Supplementary Table 1. Primers used in this study**

| Primer name | Sequence                                       | Note          |
|-------------|------------------------------------------------|---------------|
| NS-DS-F     | cacgaggccctttcgtcttcaagaaATGGATCTGACCAACATG    | Building L524 |
| NS-US-R     | atcgatgataagctgtcaaacatgagaaAAACGCGCGAGGCAGGAT | Building L524 |
| NSI-F       | TCAGCTGCTTTAGGCCACCAGTTTGAAG                   | Segregation   |
| NSI-R       | TTATCTCTCGGCTAGTGGACGCAAGCAGCG                 | Segregation   |
| petB1-F     | CGACTGGTTCGAGGAGCGTC                           | qRT-PCR, IS   |
| petB1-R     | TTGCAAAGCCGGTGGCAAAC                           | qRT-PCR, IS   |
| LS1-F       | CTCGAATCTGCCCGCGAGTT                           | qRT-PCR, LS   |
| LS1-R       | GATCCAGACCGGGGCATTGG                           | qRT-PCR, LS   |

188 IS, internal standard; LS, limonene synthase.

189 **Supplementary references**

- 190 1. Pedregosa F, *et al.* Scikit-learn: Machine Learning in Python. *J Mach Learn Res* **12**, 2825-2830  
191 (2011).
- 192  
193 2. Barrett P, Hunter J, Miller JT, Hsu JC, Greenfield P. matplotlib - A portable python plotting  
194 package. *Astr Soc P* **347**, 91-95 (2005).
- 195  
196 3. Virtanen P, *et al.* SciPy 1.0: fundamental algorithms for scientific computing in Python. *Nat*  
197 *Methods* **17**, 261-272 (2020).
