# Supplementary material for: Machine learning-informed and synthetic biology-enabled semi-continuous algal cultivation to unleash renewable fuel productivity
Source: PubMed Central journal article supplement (PMC8795378; doi:10.1038/s41467-021-27665-y), 2022-01-27
Supplement: 41467_2021_27665_MOESM3_ESM.pdf [file 41467_2021_27665_MOESM3_ESM.pdf]

### **Description of Additional Supplementary Files**

File Name: Supplementary Movie 1

Description: Video showing the aggregation-based sedimentation in Eppendorf tubes. The video was speeded up for 32 times and recorded the first seven minutes of the sedimentation.
